# Supplementary material for: Design and assessment of a public health course as a general education elective for non-medical undergraduates
Source: Front Public Health. 2025 Feb 17;13:1496283. doi: 10.3389/fpubh.2025.1496283 (PMC11872931; doi:10.3389/fpubh.2025.1496283)
Supplement: Supplementary file 2 [file Table_2.xlsx]

## Sheet: Sheet1
Student number	Full name	Special field of study	Mid-term questions	Mid-term question summary keyword 1	Mid-term question summary keyword 2	End-of-term advice	Suggested keyword at the end of the term 1	Suggested keywords at the end of the term 2
2110125		Political Science and Administration	As a student majoring in political science and public administration, I have taken a course in social medicine and global health governance. In that course, the teacher linked the development process of public health with the changes in social structure from the perspective of sociology.It is believed that it is with the continuous acceleration of the modernization process that the social structu…	Social change and public health
2111664		History
2112379		Communication engineering	My question is "Is the epidemic of chronic diseases related to genes?"Chronic diseases, such as cardiovascular diseases, diabetes, cancer, etc., are the main causes of a large number of deaths and disease burdens worldwide. Here are a few reasons why I think chronic diseases are prevalent on the Internet: 1. Unhealthy lifestyle: Changes in modern lifestyle have led people to become more accustome…	Chronic diseases and genes
2112420		History (Bo Ling Class)	Hello, teacher! I'm Liu Qingyuan (2112420), an elective course of "Public Health and Health". Sorry, I forgot to send you the question a few days ago. Now I am applying for a reissue. I hope you can approve it. Personally, I major in history. In the previous reading, I learned that the emergence of acne cultivation in ancient China is related to the factors of Buddhism and folk beliefs, so I have…	Ancient Chinese acne cultivation technique
2210410		International Chinese Education
2210561		Automate	Question: When faced with global public health problems caused by human factors, what can we, as ordinary people, do to effectively reduce the negative impact? Reason: In recent years, global public health problems have come one after another. From the coronavirus in previous years to Japan's repeated discharge of nuclear wastewater this year, the living environment of human beings seems to be be…	Globalization and what individuals can do
2210838		Science of law	Student number: 2210838 Name: Huang Wanxin Question: Does the prevailing view on the Internet that "drinking more water is a scam" and "traditional Chinese medicine does not advocate people with spleen deficiency to drink more water" have a reasonable scientific basis? Reason: Recently, the view that "drinking more water is a scam" prevails on Xiaohongshu, Weibo and other online platforms, and so…	Drink water scientifically
2210987		Software engineering	In the field of public health and health, the impact of socio-economic factors on health and disease transmission. For example, how do factors such as poverty, education level and network affect people's health?	Socio-economic factors, such as income and education level
2211235		Cultural relics and museology	Hello, Mr. Li!I'm Yang Xiyuan (2211235), a student of public health and health in Jinnan 0935. I'm sorry to email you so late. The following is my discussion topic and reason (ordinary type). Topic: What are the main factors affecting the formation of ophthalmic diseases such as myopia and farsightedness, and whether acquired myopia will be inherited? Reason: There are many students around who we…	Short-sighted
2211324		Cultural relics and museology
2211609		Material chemistry
2211754		Intelligent science and technology	Is loneliness a public health problem? Is the emotional focus of the population an area that needs to be considered and studied in public health?	Lonely
2211920		International Chinese Education
2212213		Finance	Public Health and Problems Group Report and Discussion Homework Ordinary Type Fan Changhong 2212213 Question: Has Qigong fitness really played a certain positive role in the construction of public health? Is there any scientific evidence to explain it? Is it pseudoscience? (Apart from some of the elements of stentatiousness, can practicing Qigong really affect human health? "The online rumor can …	Qigong
2213084		Science of law	Why is there a difference between the reports of AIDS infection in various provinces and cities in China and the actual situation? (II) Reason It is often found that in some reports on the situation of AIDS infection in various provinces and cities in China, there are often more cases in some provinces in real life, but the data shows fewer, while the data shows more cases in reality. Therefore, …	AIDS Report
2310086		Marxist theory
2310120		Marxist theory	Drug abuse can lead to addiction and other behavioral disorders, causing serious public health and social problems. Are there any relevant measures or publicity and education activities in public health and health that can solve the increasingly serious problem of drug abuse in recent years? ( Drug abuse, such as overdose of various narcotic drugs, psychotropic drugs, etc.)	Drug abuse and addiction	Health education
2310366		Public management category	See the paper version	Globalization, urbanization and infectious diseases
2310392		Public management category	What are the challenges of public health issues in the process of urbanization, and how should we deal with them?	Urbanization and health
2310992		Information Engineering Innovation Class	See the paper	Application of AI in the field of public health
2311063		Information Engineering Innovation Class	Are some non-communicable diseases within the scope of discussion on the topic of "public health"?For example, tinnitus or some mental illnesses caused by noise. Does the prevention and treatment of these diseases have a category related to public health prevention and control?	Non-communicable disease
2311101		Information Engineering Innovation Class
2311326		Information Engineering Innovation Class	In the context of globalization and population mobility, public health is facing more and more challenges. The spread of the epidemic is no longer limited to a certain region or country, but may spread rapidly around the world. In this case, how should public health better prevent and control the spread of the epidemic?	The impact of globalization on infectious diseases
2311380		Science Experimental Class (things
2311456		Information Engineering Innovation Class
2311548		Finance	Question: Common causes of bacterial food poisoning and how to prevent this type of food poisoning? Reason: This question is based on the need for an in-depth understanding of the mechanism and impact of bacterial food poisoning. Understanding its common causes, such as improper food treatment, substandard storage conditions or cross-contamination, can help students realize the importance of pers…	Bacterial food poisoning and prevention
2311597		Finance
2311730		Finance	Question: What kind of requirements and difficulties do public health and health face, and how to effectively close the distance between health and the common people. We know that public health is a multidisciplinary field dedicated to protecting and improving community health, preventing diseases, and prolonging people's lives. It involves many aspects such as the study of the mode of transmissi…	Pay more attention to public health
2311979		Finance	Question: Bacterial food poisoning occurs frequently around the world. Why has this problem not been fundamentally solved even with the development of modern technology and sanitary conditions? Reason: Bacterial food poisoning is a long-standing and persistent problem. Although great progress has been made in science and technology and sanitary conditions in the past few decades, including food p…	Bacterial food poisoning and prevention
2312063		Information Engineering Innovation Class	Question: Under the current global public health challenges, basic public health measures also face many challenges and obstacles in the process of implementation. How to ensure that all people have equal access to health protection and services? Reason: 1. Although public health measures such as vaccination, health education, and the construction of health facilities have been proven to have a p…	Globalization and public health equality
2312097		Intelligent science and technology
2312124		Information Engineering Innovation Class	Question: How to improve the inequality in low-income communities in accessing high-quality health services? Reason: Low-income communities often face inadequate access to health services, including not only basic health care services, but also preventive health care and health promotion services. This inequality can be caused by a variety of factors, including economic obstacles, inconvenient tr…	Low-income people	Unequal health services
2312174		Intelligent science and technology
2312183		Information Engineering Innovation Class	There is a question about public health and health. In the current globalization and urbanizationAgainst the background of accelerated progress, people's lifestyle and eating habits have changed greatly, which has brought new challenges to public health and health. May I ask how we should use modern technological means, such as big data and artificial intelligence, to improve the efficiency and q…	Big data and artificial intelligence	Modern information technology and health
2312225		Intelligent science and technology
2312352		Information Engineering Innovation Class	Can you research something (small instrument or test paper) (requires cheap and popular) so that ordinary people can test whether the food they want to eat at home is safe and hygienic?	Rapid food safety testing
2312366		Information Engineering Innovation Class	In the last century, people ate coarse grains and were of good physical quality. Modern people eat refined grain. Everything they eat is very exquisite, but their physical quality is getting worse and worse. Is there really a basis for the older generation's mouths of "not clean, no disease after eating", or is coarse grain really better than refined grain?	Coarse grain diet
2312572		Intelligent science and technology	How to balance the feasibility and effectiveness of prevention strategies in different socio-economic contexts?	Economic and public health strategies
2312609		Information Engineering Innovation Class	Question: In public health practice, how to effectively put the concept of preventive medicine, foodThe combination of hygiene standards, nutrition and health knowledge and microbial immune mechanism, etc., To formulate and implement comprehensive public health interventions?	Combination of ideas and public health intervention
2313034		Information Engineering Innovation Class	Question: Can I lose weight when I'm hungry? How to eat healthily to lose weight better and ensure that nutrition can be replenished? Reason: Nowadays, more and more people pay attention to their figure, lose weight, and pursue bone beauty. However, diet recipes also make some people's physical conditions appear. The physical quality is getting worse and worse. The weight loss methods of people w…	Lose weight
2313120		Information Engineering Innovation Class	Question: Is it recommended to drink tap water? Reason for the question: The content of minerals in tap water is high. In the course of nutritional diet and disease prevention, the teacher recommends drinking more to supplement minerals. I want to know whether drinking tap water is better than drinking pure water.	Pure water and minerals
2313250		Information Engineering Innovation Class	In the class of chemical pollution and prevention, about the safety evaluation of carcinogens, are the results obtained through animal experiments also applicable to the population? How to make this distinction and judgment? Could you please explain the practicality of this animal experiment in detail?	Toxicology animal experiments are extrapoled to people.
2313391		Information Engineering Innovation Class	Question: How to ensure the hygiene and safety of using public tableware. Description: Shared tableware is one of the transmission routes of infectious diseases, especially for those transmitted through food or oral mucosa, such as salmonella, E. coli, norovirus and parasites.At present, the catering industry does not have particularly clear norms for the handling of tableware, and it is also dif…	Public tableware hygiene
2313508		Information Engineering Innovation Class
2313606		Finance	Hello, teacher! My question is: For most Chinese people, they tend to use squat toilets instead of toilets when using public toilets. Many people will feel that the toilets are very "dirty" and seem to be easy to transmit diseases. Does the toilet in public toilets have such safety hazards?	Public toilet hygiene
2313923		Information Engineering Innovation Class	Hello, teacher. In the eight articles of the new country of AIDS you mentioned in the last class about AIDS-related issues, it was mentioned that AIDS is an incurable serious infectious disease. Today, I browsed the recent video of scientists using Nobel Prize technology to successfully remove infected HIV on TikTok and b station. Is that Does it mean that AIDS is likely to be cured in the future…	New technologies for AIDS
2313941		Information Engineering Innovation Class	Hello, teacher! My question is: In the digital era, how can big data and artificial intelligence be applied to disease prediction and monitoring in public health research and practice? If new diseases occur, how can they help detect disease outbreaks and transmission trends in advance and develop effective prevention and control strategies? Reason: Disease prediction and monitoring are crucial to…	The role of big data and artificial intelligence in public health
2314003		Information Engineering Innovation Class	After listening to Mr. Li's lecture, in fact, I feel that my knowledge of public health is very lacking, and part of the reason for this deficiency comes from "not hearing" and partly from "not taking the initiative to ask", so there are many infectious diseases in society today. If you want to improve your public health awareness, you need to pay more attention to the subjective aspect, and the …	Public health education	Community public health
2314035		Information Engineering Innovation Class	Question: How to effectively integrate and utilize big data technology to improve public health emergency response capabilities? Reason: With the advent of the digital era, big data technology is increasingly widely applied in the field of public health. However, how to effectively integrate and use big data technology to improve public health emergency response capacity is still an issue worth e…	The role of big data and artificial intelligence in public health
2314081		Information Engineering Innovation Class	See the photo	Pay more attention to public health
